# Supplementary material for: Seasonal source influence on river mass flows of benzotriazoles
Source: Royal Society of Chemistry journal article supplement (doi:10.1039/c2em10826g), 2012-01-01
Supplement: c2em10826g.pdf [file c2em10826g.pdf]

# Seasonal source influence on river mass flows of benzotriazoles

**Aliz Kiss, Elke Fries\***

## Supporting Information

1 Table

---

<sup>a</sup> Institute of Environmental Systems Research, University of Osnabrueck, D-49076 Osnabrueck, Germany. Fax: +49 (0)541 969 2599; Tel: +49 (0)541 969 3441; E-mail: efries@uni-osnabrueck.de

**TABLE SI-1:** Concentrations and mass flows of 1H-BT, 4Me-BT and 5Me-BT in tributaries during different sampling times (values below limit of quantitation are parenthesized).

| Concentrations<br>(ng/L)  | 16-17/01/09      |                   |      | 09-13/02/09      |                   |      | 24-25/07/09      |                   |      | 17-20/11/09      |                   |      | 07/02/10         |                   |     | 07-09/07/10      |                   |      |
|---------------------------|------------------|-------------------|------|------------------|-------------------|------|------------------|-------------------|------|------------------|-------------------|------|------------------|-------------------|-----|------------------|-------------------|------|
|                           | 1H-BT/<br>5Me-BT | 4Me-BT/<br>5Me-BT |      | 1H-BT/<br>5Me-BT | 4Me-BT/<br>5Me-BT |      | 1H-BT/<br>5Me-BT | 4Me-BT/<br>5Me-BT |      | 1H-BT/<br>5Me-BT | 4Me-BT/<br>5Me-BT |      | 1H-BT/<br>5Me-BT | 4Me-BT/<br>5Me-BT |     | 1H-BT/<br>5Me-BT | 4Me-BT/<br>5Me-BT |      |
| <b>Geraethsbach</b>       |                  |                   |      |                  |                   |      |                  |                   |      |                  |                   |      |                  |                   |     |                  |                   |      |
| <b>P8</b>                 | 6013             | 5054              | 694  | 1850             | 1428              | 262  | 206              | 240               | 107  | 1160             | 1123              | 343  | 1881             | 2441              | 684 | 900              | 649               | 127  |
| <b>Apfelbach</b>          |                  |                   |      |                  |                   |      |                  |                   |      |                  |                   |      |                  |                   |     |                  |                   |      |
| <b>P10</b>                | <5               | 26                | <4   | 123              | 38                | (10) | <5               | <2                | <4   | <5               | 94                | (6)  | <5               | <2                | <4  | <5               | 64                | (11) |
| <b>Landgraben</b>         |                  |                   |      |                  |                   |      |                  |                   |      |                  |                   |      |                  |                   |     |                  |                   |      |
| <b>P12</b>                | <5               | <2                | <4   | 2564             | 1279              | 183  | 110              | 418               | 73   | 884              | 1447              | 191  | 1231             | 2040              | 222 | 333              | 392               | 46   |
| <b>Hegbach</b>            |                  |                   |      |                  |                   |      |                  |                   |      |                  |                   |      |                  |                   |     |                  |                   |      |
| <b>P15</b>                | <5               | <2                | <4   | 131              | 29                | 17   | <5               | <2                | <4   | <5               | <2                | <4   | <5               | <2                | <4  |                  |                   |      |
| <b>Mass loads (g/day)</b> |                  |                   |      |                  |                   |      |                  |                   |      |                  |                   |      |                  |                   |     |                  |                   |      |
| Mass loads<br>(g/day)     | 1H-BT/<br>5Me-BT |                   |      | 1H-BT/<br>5Me-BT |                   |      | 1H-BT/<br>5Me-BT |                   |      | 1H-BT/<br>5Me-BT |                   |      | 1H-BT/<br>5Me-BT |                   |     | 1H-BT/<br>5Me-BT |                   |      |
| <b>Geraethsbach</b>       |                  |                   |      |                  |                   |      |                  |                   |      |                  |                   |      |                  |                   |     |                  |                   |      |
| <b>P8</b>                 | 161              | 131               | 19.6 |                  |                   |      | 3                | 3                 | 1.31 | 18               | 23                | 5.28 |                  |                   |     |                  |                   |      |
| <b>Apfelbach</b>          |                  |                   |      |                  |                   |      |                  |                   |      |                  |                   |      |                  |                   |     |                  |                   |      |
| <b>P10</b>                | -                | 0.27              | -    |                  |                   |      | -                | -                 | -    | -                | 0.75              | 0.04 |                  |                   |     |                  |                   |      |
| <b>Landgraben</b>         |                  |                   |      |                  |                   |      |                  |                   |      |                  |                   |      |                  |                   |     |                  |                   |      |
| <b>P12</b>                | -                | -                 | -    |                  |                   |      | 15.4             | 58.5              | 10.2 | 135              | 221               | 29.2 |                  |                   |     |                  |                   |      |
| <b>Hegbach</b>            |                  |                   |      |                  |                   |      |                  |                   |      |                  |                   |      |                  |                   |     |                  |                   |      |
| <b>P15</b>                | -                | -                 | -    |                  |                   |      | -                | -                 | -    | -                | -                 | -    |                  |                   |     |                  |                   |      |
